# Supplementary material for: Bioactive Compounds and Potential Health Benefits through Cosmetic Applications of Cherry Stem Extract
Source: MDPI journal article supplement (doi:10.3390/ijms25073723), 2024-03-27
Supplement: s1 [file s1]

Base peak chromatogram, m/z: 50.0040 - 1198.2907

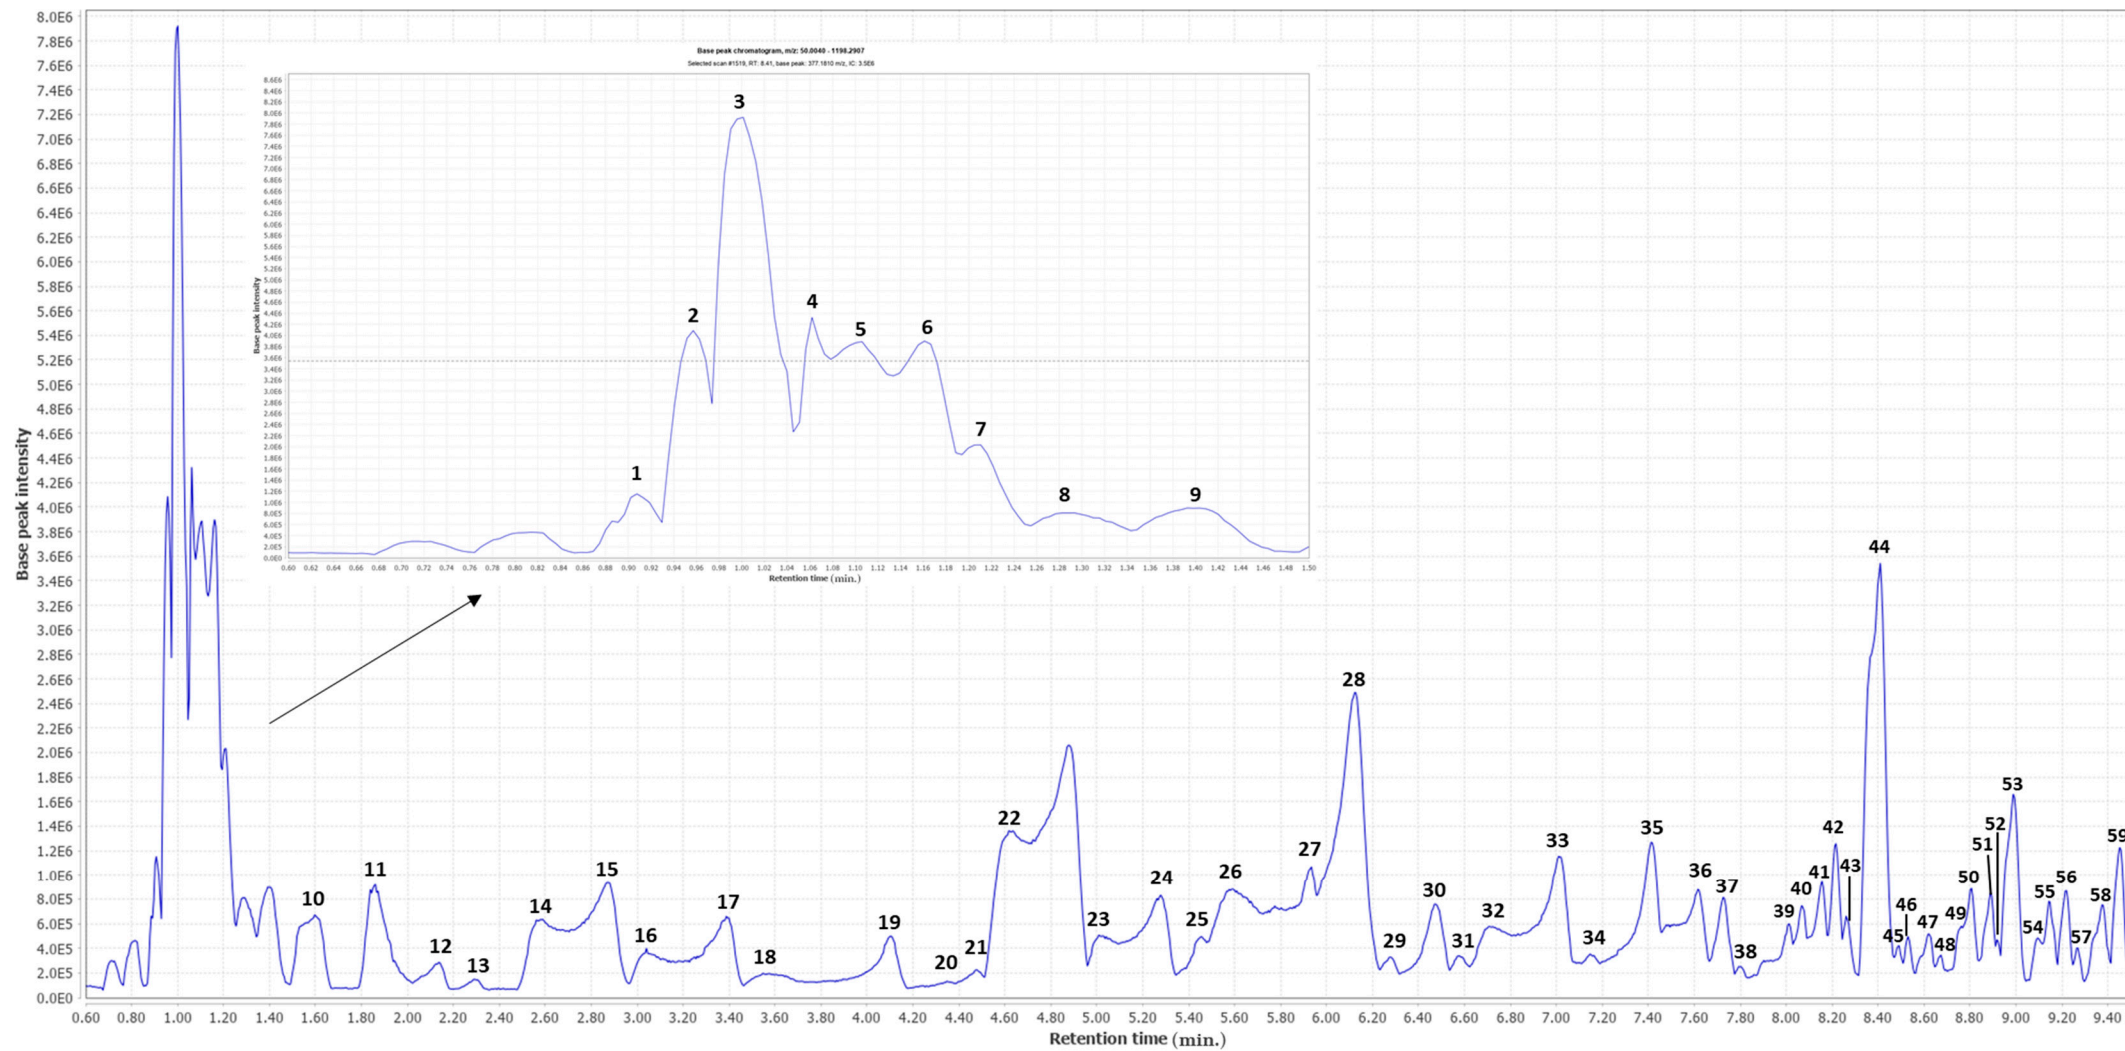

Base peak chromatogram, m/z: 50.0040 - 1198.2907

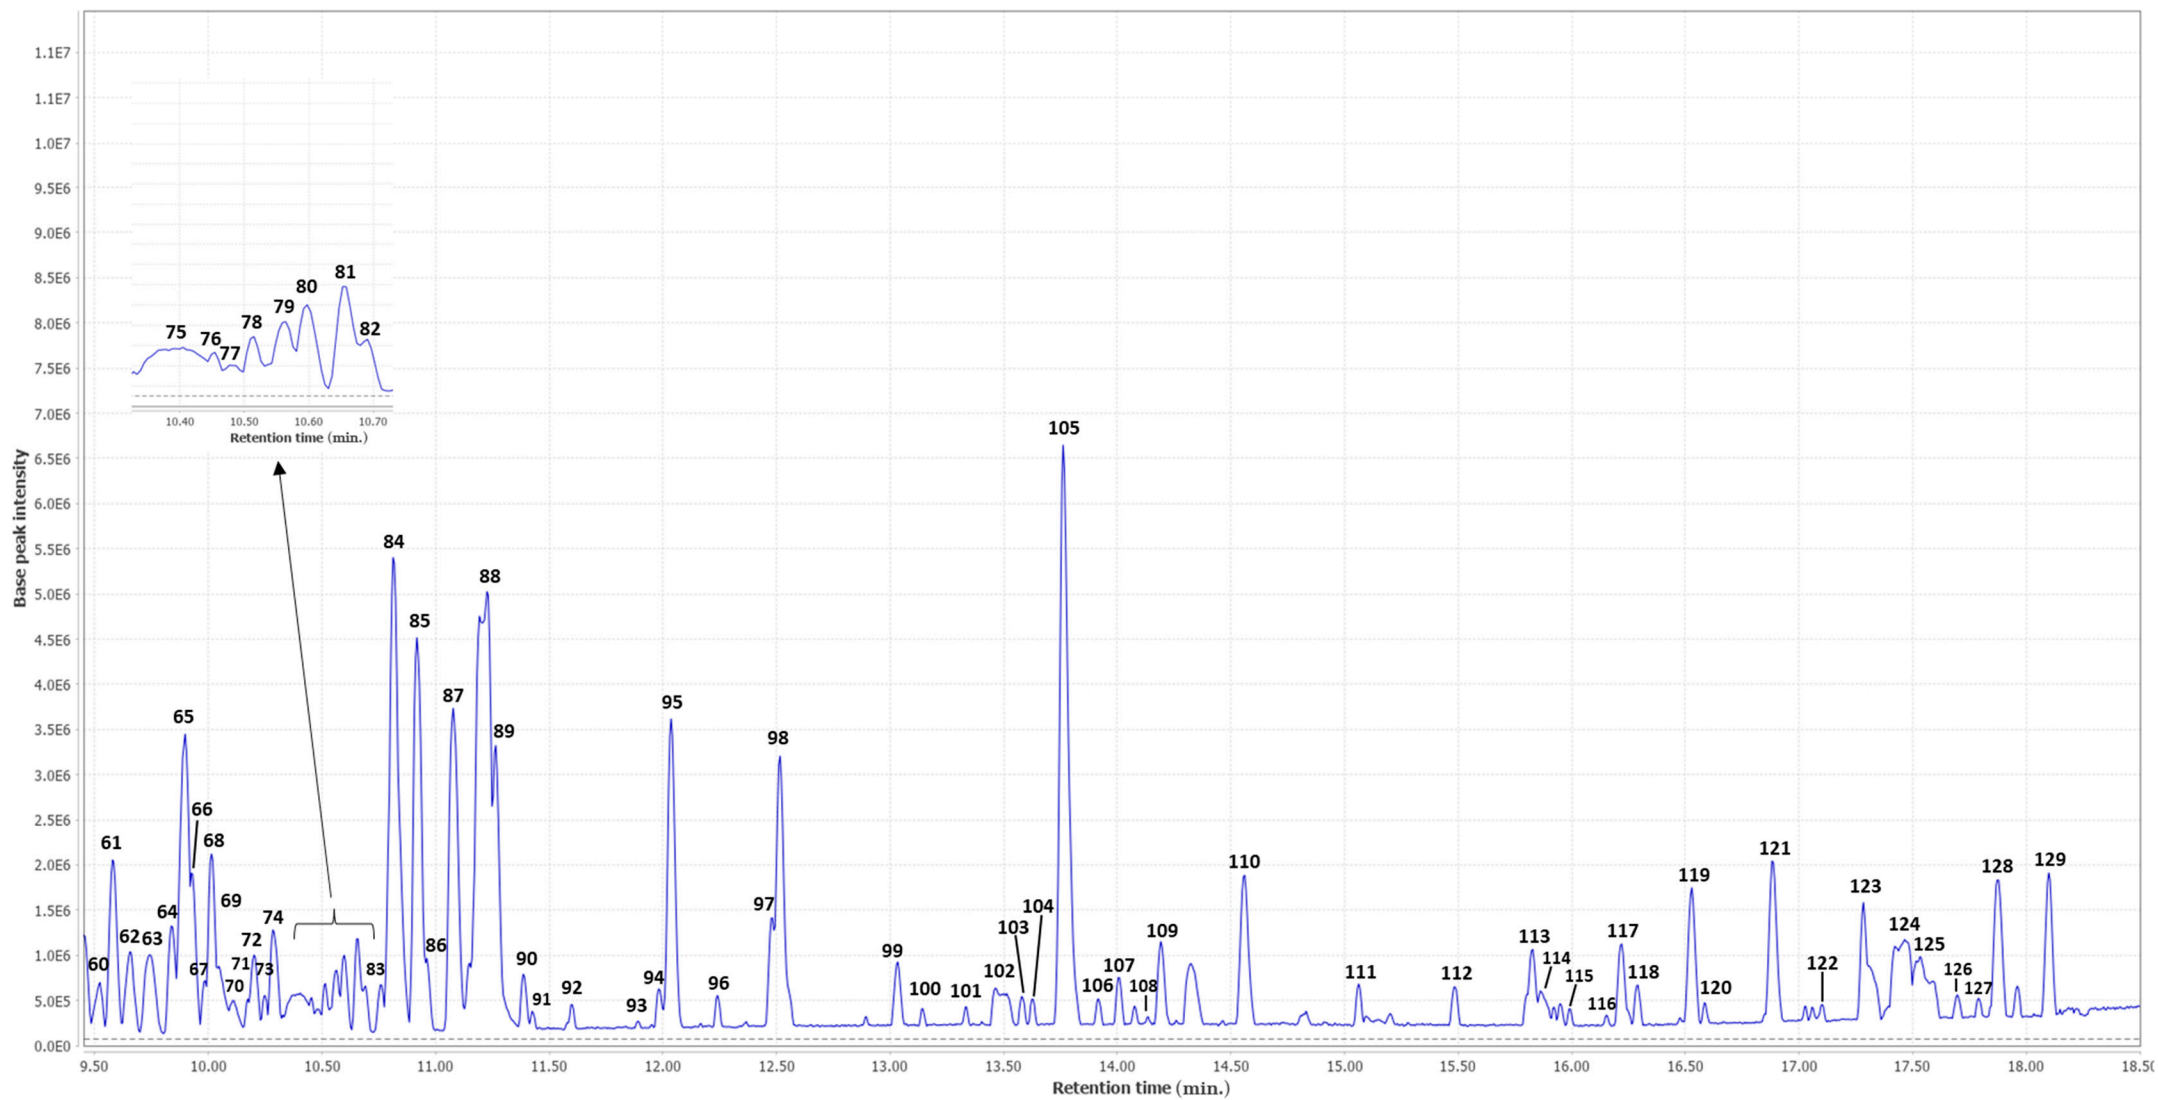

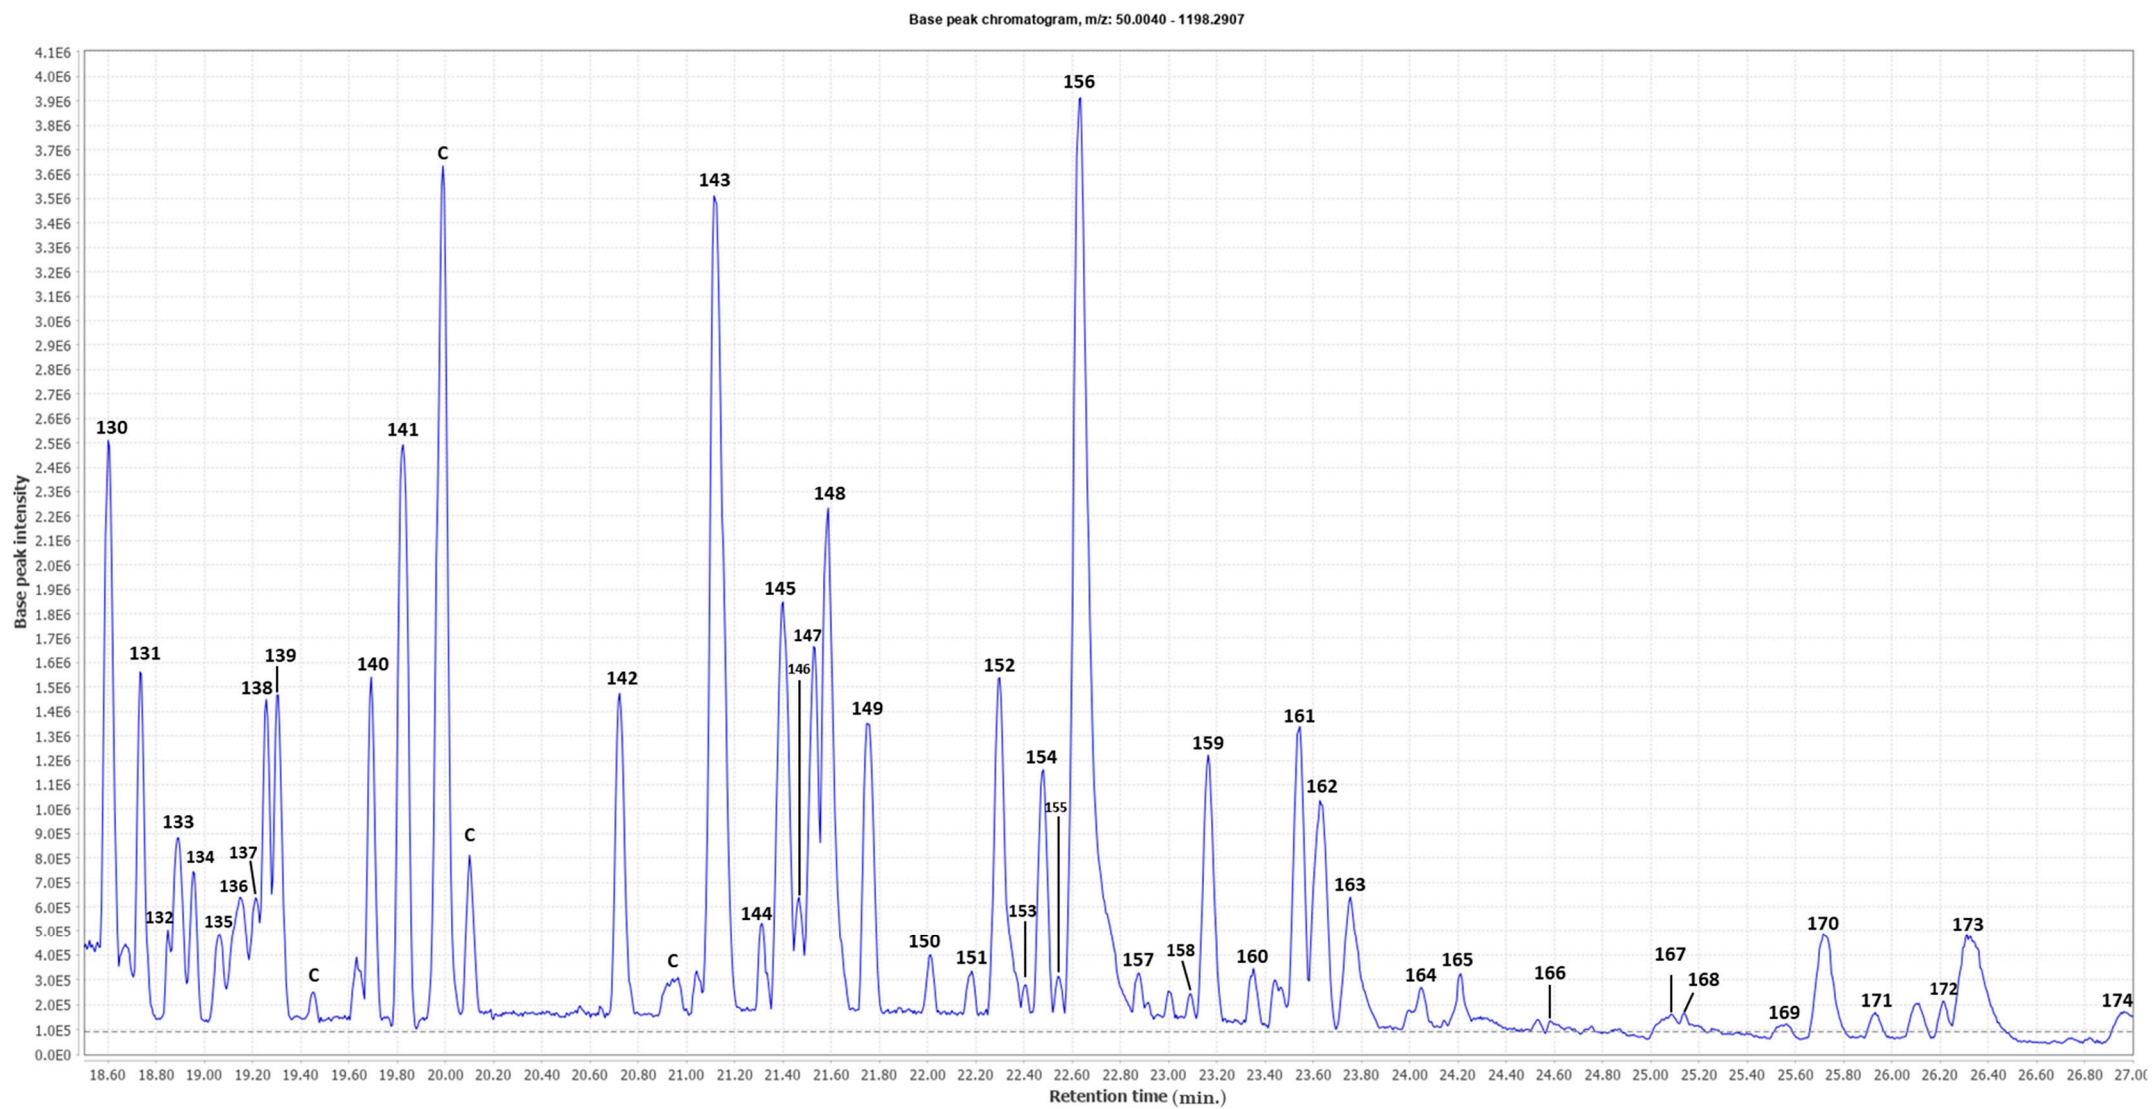

**Figure S1:** Base peak chromatogram from cherry stem extract; C: contaminant (signal detected also in blank samples).
